# Supplementary material for: Lactate promotes the growth of patient-derived organoids from hepatopancreatobiliary cancers via ENO1/HIF1α pathway and does not affect their drug sensitivities
Source: PubMed Central journal article supplement (PMC9021221; doi:10.1038/s41420-022-01014-4), 2022-04-20

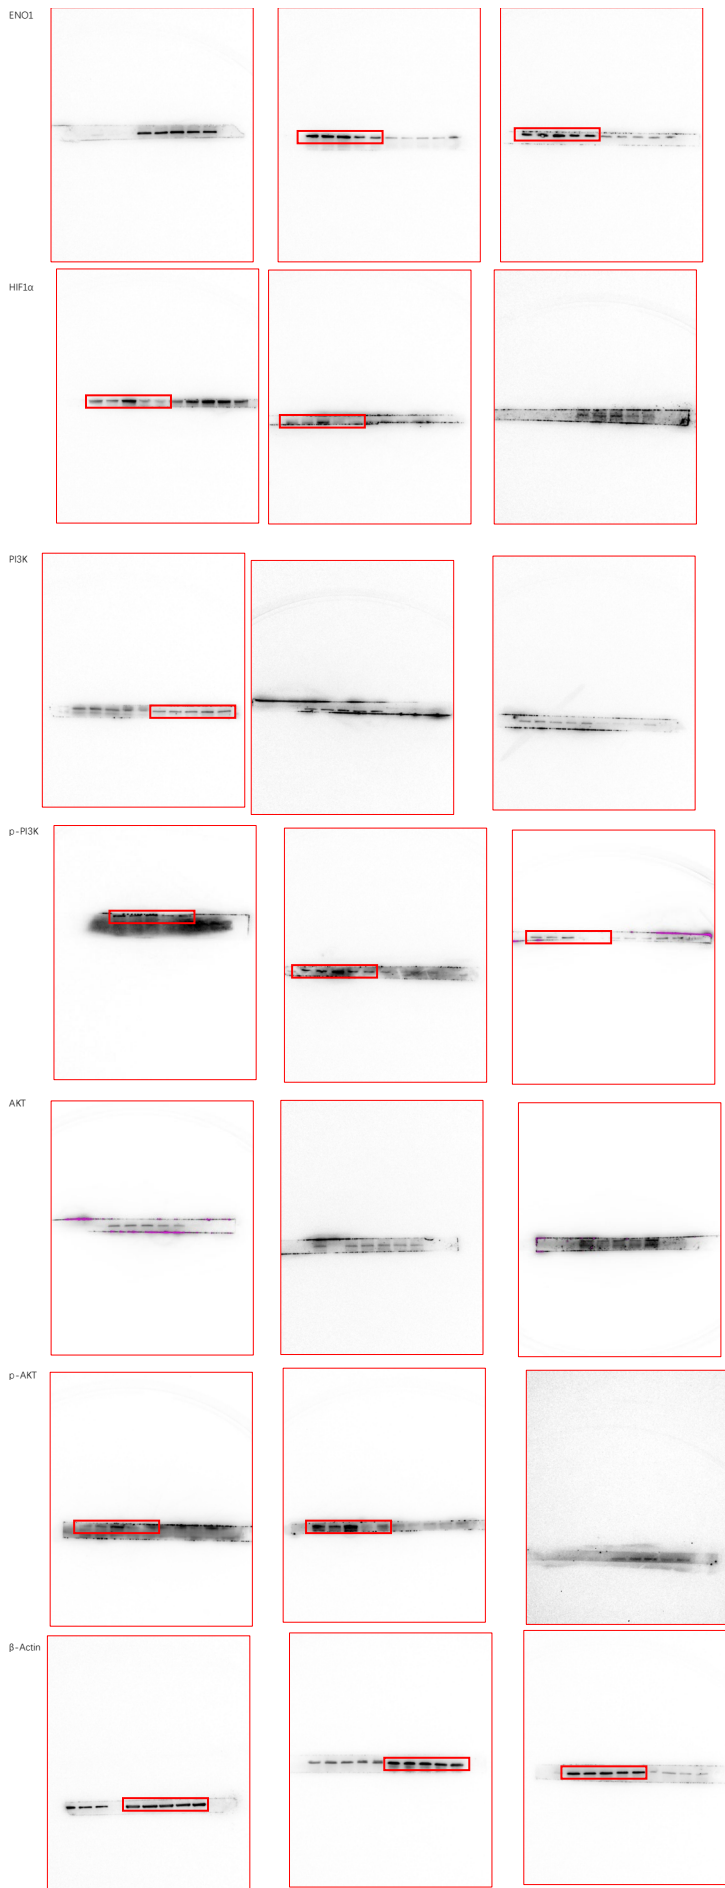

HIF1 $\alpha$

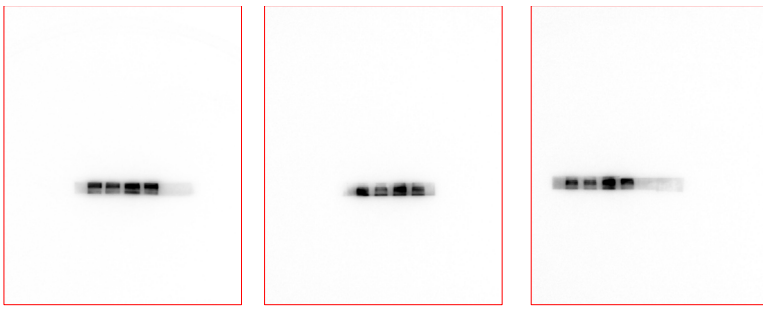

PI3K

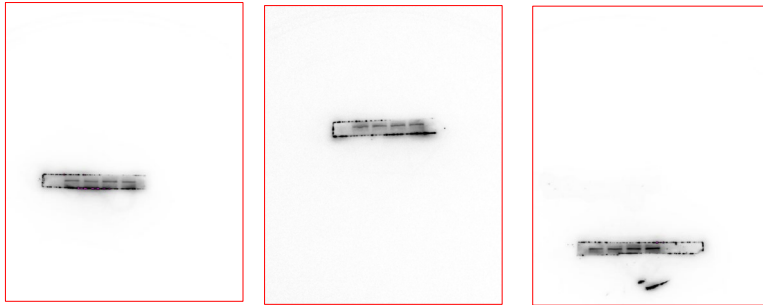

p-PI3K

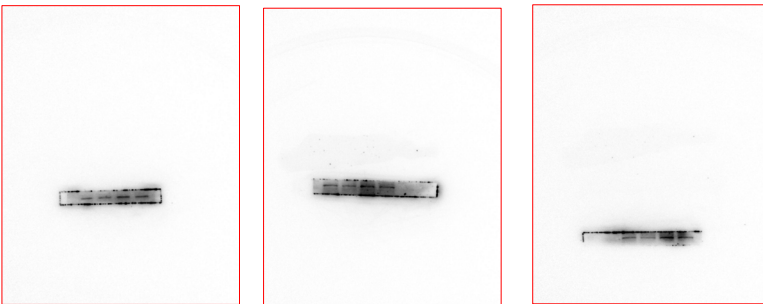

AKT

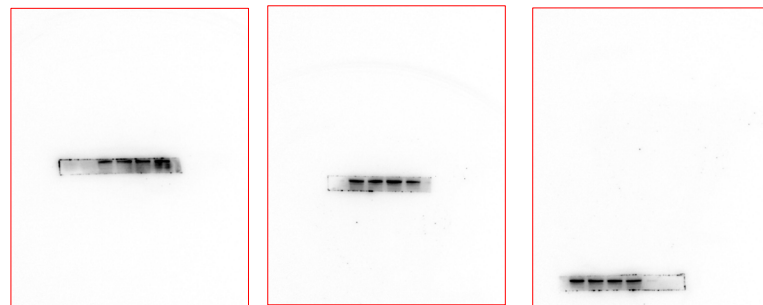

p-AKT

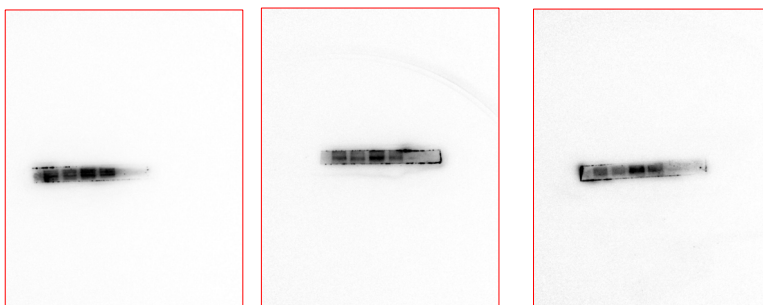

$\beta$ -Actin

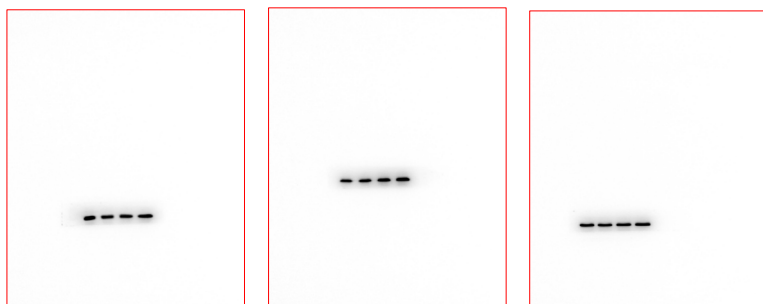

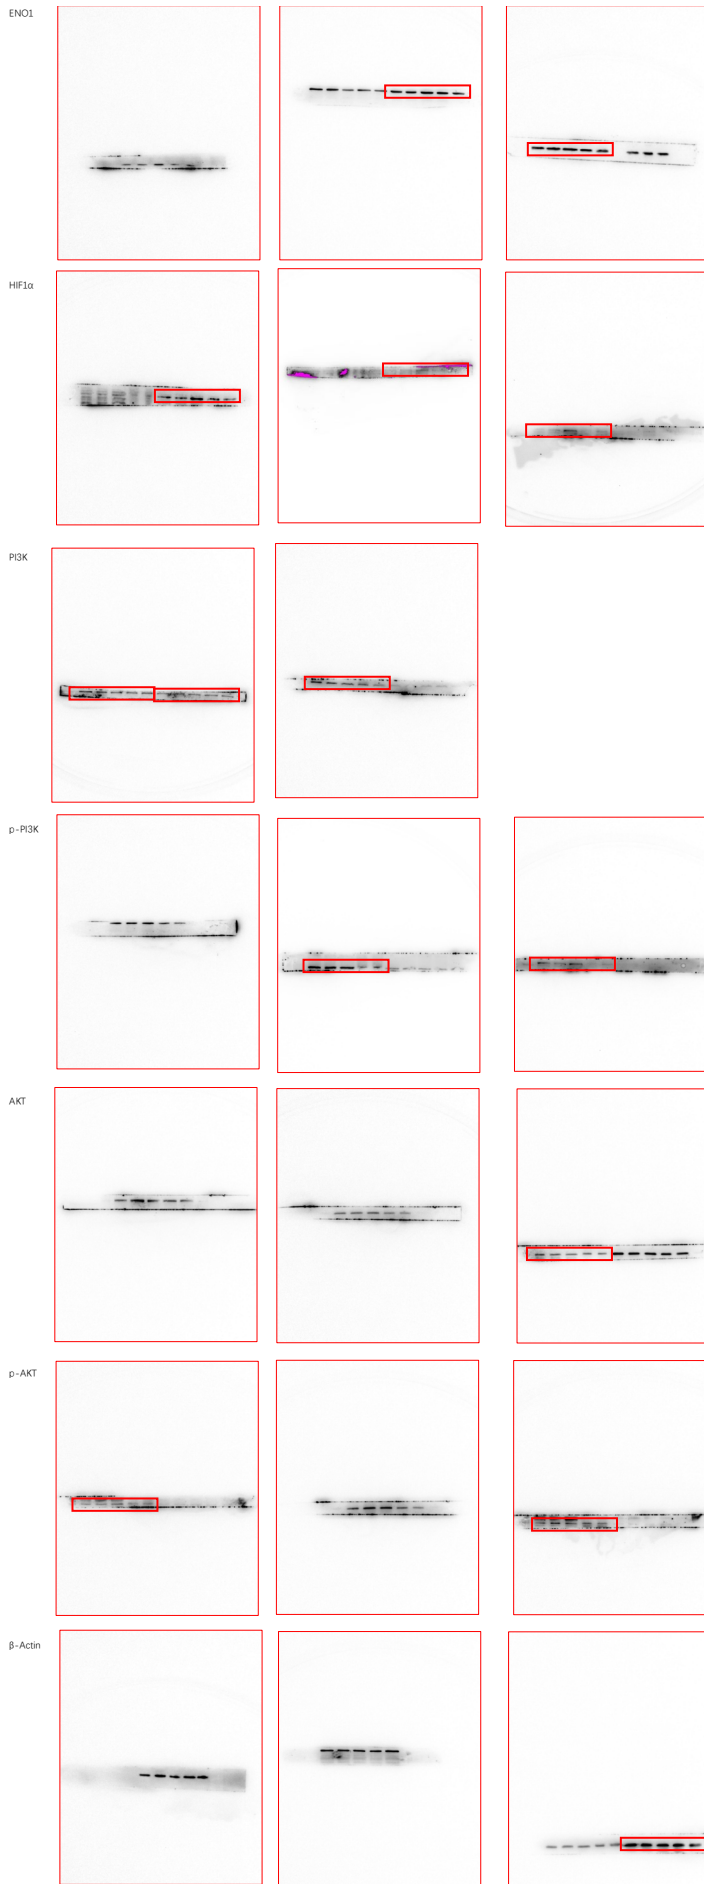

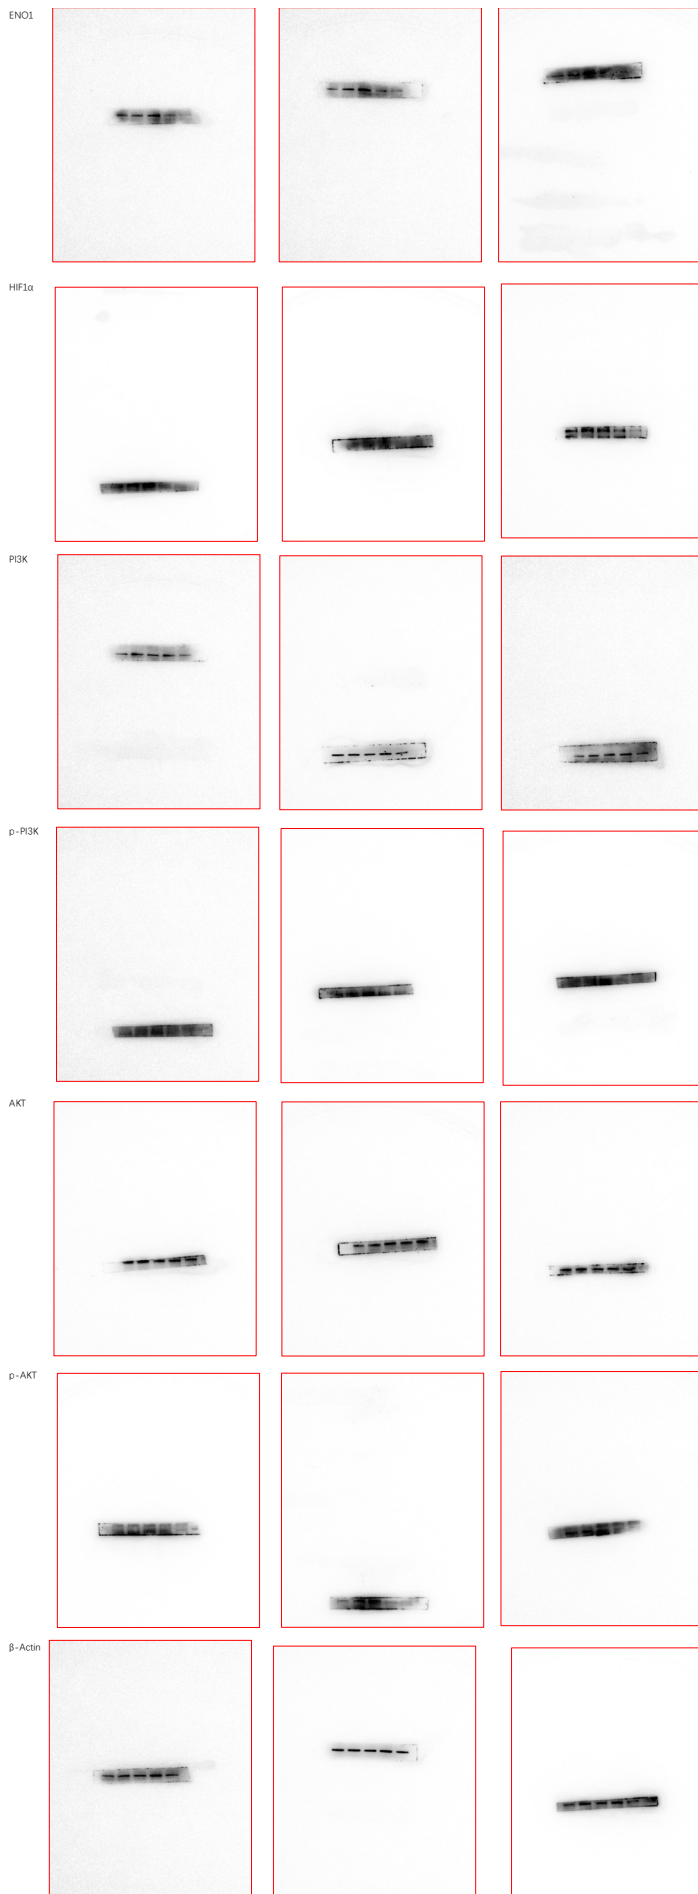

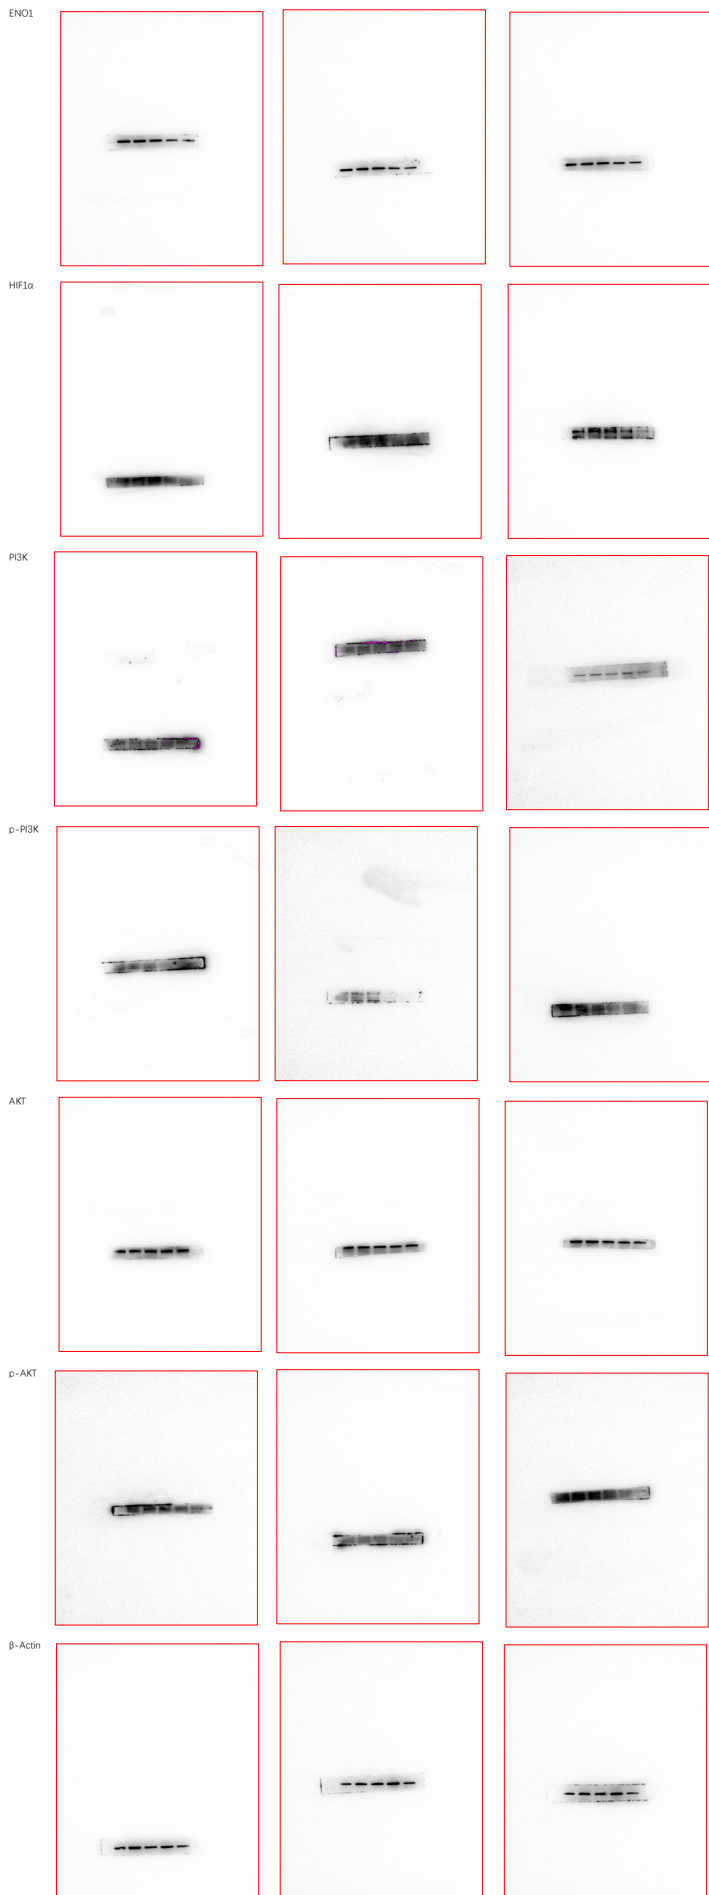

Supplement: 41420_2022_1014_MOESM8_ESM.pdf [file 41420_2022_1014_MOESM8_ESM.pdf]
